# Supplementary material
Source: PubMed Central journal article supplement (PMC6928439)
Supplement: NIHMS1042745-supplement-Supp_info.pdf [file NIHMS1042745-supplement-Supp_info.pdf]

# **High specificity of widely used phospho-tau antibodies validated using a quantitative whole-cell based assay**

**Dan Li<sup>1</sup> and Yong Ku Cho<sup>1, 2, 3, 4\*</sup>**

Departments of <sup>1</sup>Biomedical Engineering and <sup>2</sup>Chemical and Biomolecular Engineering,  
<sup>3</sup>Institute for Systems Genomics, <sup>4</sup>Connecticut Institute for the Brain and Cognitive Sciences,  
University of Connecticut, Storrs, CT 06269.

\*To whom correspondence should be addressed: Yong Ku Cho: Departments of Chemical and Biomolecular Engineering and Biomedical Engineering, Institute for Systems Genomics, University of Connecticut, Storrs CT 06269; [cho@uconn.edu](mailto:cho@uconn.edu); Tel. (860) 486-4072; Fax. (860) 486-2959.

## **Supplementary Figures and Tables**

## Supplementary Figure 1.

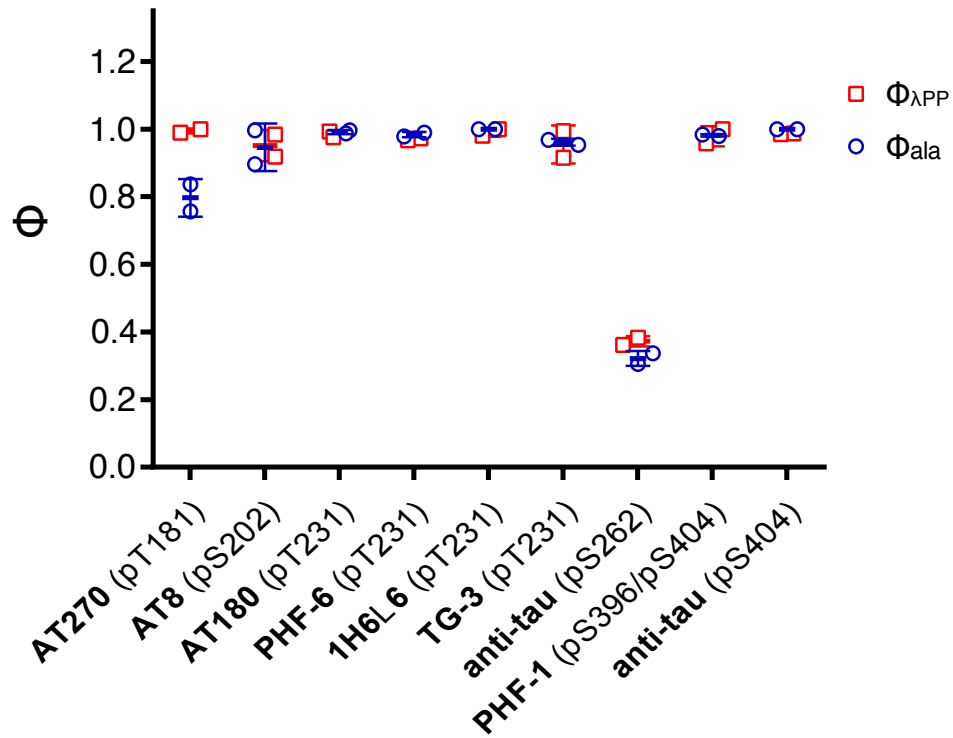

**Supplementary Figure 1.** Measurement of  $\Phi_{ala}$  and  $\Phi_{\lambda PP}$  of phospho-tau antibodies. Error bars indicate standard deviation from two independent cell culture preparations. Red,  $\Phi_{\lambda PP}$ . Blue,  $\Phi_{ala}$ .

## Supplementary Figure 2.

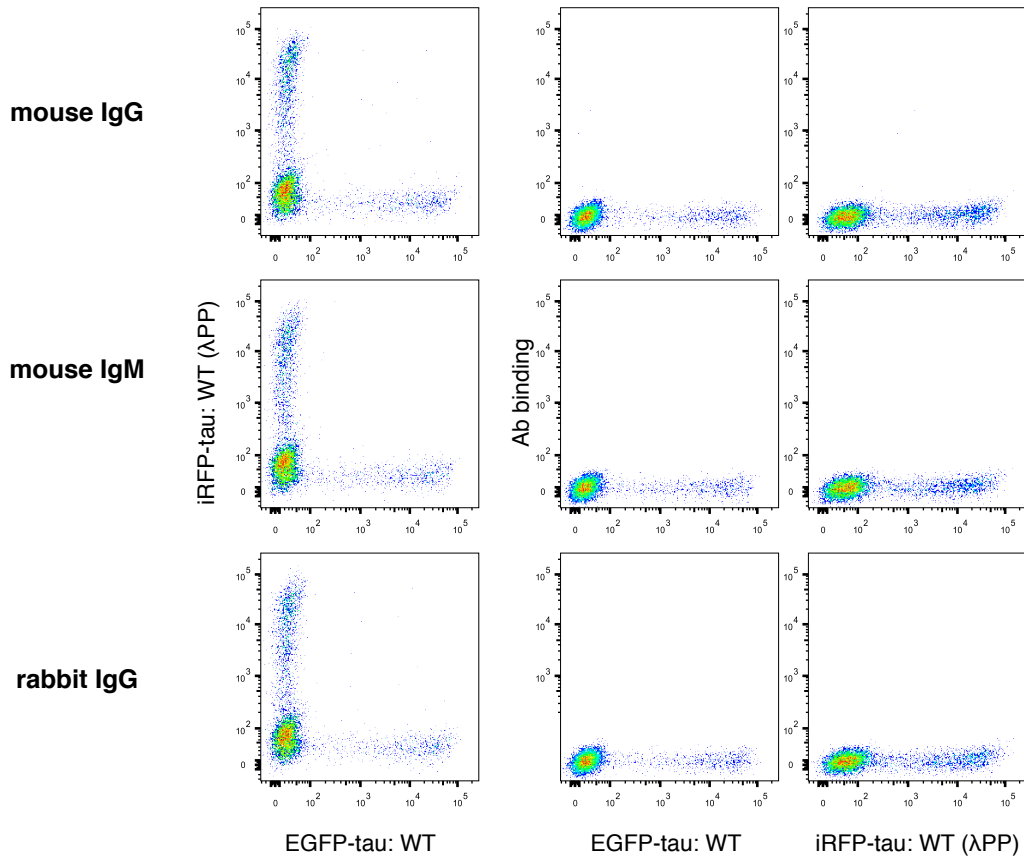

**Supplementary Figure 2.** Flow cytometry plots showing binding of isotype-matching control antibodies under the specificity quantification assay conditions.

*Supplementary Table 1. Primers for Golden Gate assembly of plasmids*

| DNA template  | Primers                                                     |
|---------------|-------------------------------------------------------------|
| pRK5-EGFP-Tau | 5'- TCCGCTGAGCCCCG -3'<br>5'- CCATGGTGGCGACCATC -3'         |
| piRFP670-N1   | 5'- ATGGTAGCAGGTCATGCC -3'<br>5'- CGGATCCGCTCTCAAGCGCGG -3' |

*Supplementary Table 2. Primers used for site-directed mutagenesis*

| Mutant                   | Primers                                                                                                      |
|--------------------------|--------------------------------------------------------------------------------------------------------------|
| T181A                    | 5'- GAGCTGGGTGGTG <b>C</b> CTTTGGAGCGGGC -3'<br>5'- GCCCGCTCCAAAG <b>G</b> CACCACCCAGCTC -3'                 |
| S202A*                   | 5'- AGTGCCTGGGG <b>C</b> GCCGGGGCTGC -3'<br>5'- GCAGCCCCGGC <b>G</b> CCCCAGGCACT -3'                         |
| T212A/S214A              | 5'- GTTGAAGGG <b>C</b> CGGGG <b>C</b> GCGGGAGCGG -3'<br>5'- CCGCTCCCGC <b>G</b> CCCC <b>G</b> CCCTTCCAAC -3' |
| T231A                    | 5'- GACTTGGGTGGAG <b>C</b> ACGGACCACTGCCACCTTCT -3'<br>5'- AGAAGGTGGCAGTGGTCCGT <b>G</b> CTCCACCCAAGTC -3'   |
| S262A                    | 5'- TTCAGTTTCTCAGTGG <b>C</b> GCCGATCTTGGACTTG -3'<br>5'- CAAGTCCAAGATCGGC <b>G</b> CCTACTGAGAACCTGAA -3'    |
| S396A/S404A <sup>§</sup> | 5'- CAGACCACTGGCG <b>C</b> CTTGTACACGATCTC -3'<br>5'- GAGATCGTGTACAAG <b>G</b> CGCCAGTGGTGTCTG -3'           |
| S404A                    | 5'- AGATGCCGTGGAG <b>C</b> CGTGTCCCCAGAC -3'<br>5'- GTCTGGGGACACG <b>G</b> CTCCACGGCATCT -3'                 |

Note: \*Previous study has shown that AT8 recognition requires only Ser202 to be phosphorylated in tau (Goedert *et al.* 1993).

<sup>§</sup>S396A/S404A were obtained using the S404A mutant as a template to generate double mutations.

## References

Goedert, M., Jakes, R., Crowther, R. A., Six, J., Lubke, U., Vandermeeren, M., Cras, P., Trojanowski, J. Q. and Lee, V. M. (1993) The abnormal phosphorylation of tau protein at Ser-202 in Alzheimer disease recapitulates phosphorylation during development. *Proc Natl Acad Sci U S A* **90**, 5066-5070.
